# Supplementary material for: Preparation of a “sliding graft copolymer”, an organic solvent-soluble polyrotaxane containing mobile side chains, and its application for a crosslinked elastomeric supramolecular film
Source: Royal Society of Chemistry journal article supplement (doi:10.1039/b715231k), 2007-11-27
Supplement: b715231k.pdf [file b715231k.pdf]

Supplementary information for

**Preparation of a “sliding graft copolymer,” an organic solvent-soluble polyrotaxane containing mobile side chains, and its application for a crosslinked elastomeric supramolecular film**

by Jun Araki, Toshiyuki Kataoka and Kohzo Ito

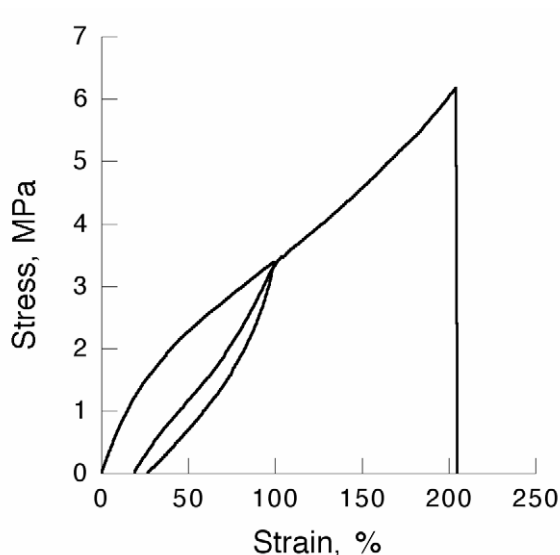

Figure. Typical stress-strain curve for the crosslinked SGC film showing hysteresis. The sample was first drawn up to 100% of strain followed by recovery to zero strain and subsequent second drawing up to fracture. The sample was first drawn up to 100% of strain followed by recovery to zero strain and subsequent second drawing up to fracture.

Table. Properties of the starting hydroxypropylated polyrotaxane.

|                                                           |                     |
|-----------------------------------------------------------|---------------------|
| $M_w$                                                     | 124000 <sup>a</sup> |
| $M_w/M_n$                                                 | 1.57 <sup>a</sup>   |
| Inclusion ratio of the starting (unmodified) polyrotaxane | 25% <sup>b</sup>    |
| Molecular substitution of CD                              | 8.82 <sup>c</sup>   |

<sup>a</sup> By gel permeation chromatography.

<sup>b</sup> By <sup>1</sup>H NMR.

<sup>c</sup> Calculated from supplier's information regarding the “degree of substitution” (49%), which was calculated as the ratio of the molar number of bound propylene oxide to the molar number of

hydroxyl groups in polyrotaxane, as obtained from the  $^1\text{H}$  NMR results. The value is expressed as the average molar number of propylene oxide bound to one  $\alpha$ -CD.
